# Supplementary material for: Development of an oral satraplatin pharmaceutical formulation by encapsulation with cyclodextrin
Source: Royal Society of Chemistry journal article supplement (doi:10.1039/c5ra27182g), 2016-01-01
Supplement: c5ra27182g1.pdf [file c5ra27182g1.pdf]

## Supplementary Data

# Development of An Oral Satraplatin Pharmaceutical Formulation by Encapsulation with Cyclodextrin

Jian-qiang Zhang,<sup>a†</sup> Ke Li<sup>b†</sup>, Kun-Ming Jiang,<sup>a</sup> Yan-wei Cong,<sup>c</sup> Shao-ping Pu,<sup>c\*</sup> Xiao-  
guang Xie,<sup>a</sup> Yi Jin,<sup>a\*</sup> and Jun Lin<sup>a\*</sup>

<sup>a</sup> *Key Laboratory of Medicinal Chemistry for Natural Resource (Yunnan University), Ministry  
Education, Advanced Analysis and Measurement Center, School of Chemical Science and  
Technology, Yunnan University, Kunming, 650091, P. R. China.*

<sup>b</sup> *The first Department of Medical Oncology, the Third Affiliated Hospital of Kunming Medical  
University, Kunming 650031*

<sup>c</sup> *Kunming Guiyan Pharmaceutical Co., Ltd., Kunming 650093*

13

14

15

16

17

18

19

20

---

<sup>†</sup> These authors contributed equally to this paper.

\* Corresponding authors. Tel./fax: +86 871 503 3215. *E-mail addresses:* pushaoping@163.com (S.P. Pu); jinyi@ynu.edu.cn (Y. Jin); linjun@ynu.edu.cn (J. Lin)

1

## 2 1. XRD analysis

3 The lack of crystallinity is an added piece of evidence for the formation of inclusion complex.

4 **Fig. S1** shows the XRD patterns of satraplatin,  $\beta$ -CD and their inclusion complex. In **Fig. S1**,

5 satraplatin (**Fig. S1(a)**) and  $\beta$ -CD (**Fig. S1(b)**) indicated sharp, intense peaks showing that both of

6 them were in crystalline form. The complex is not a superimposition of the patterns of the pure

7 satraplatin. Some diffraction patterns were dramatically affected in the inclusion complex, which

8 formed a new crystal structure of the solid complex. Additionally, the diffraction pattern of the

9 physical mixture (**Fig. S1(c, d)**) is different from the complex, indicating that there was an

10 interaction between satraplatin and  $\beta$ -CD.

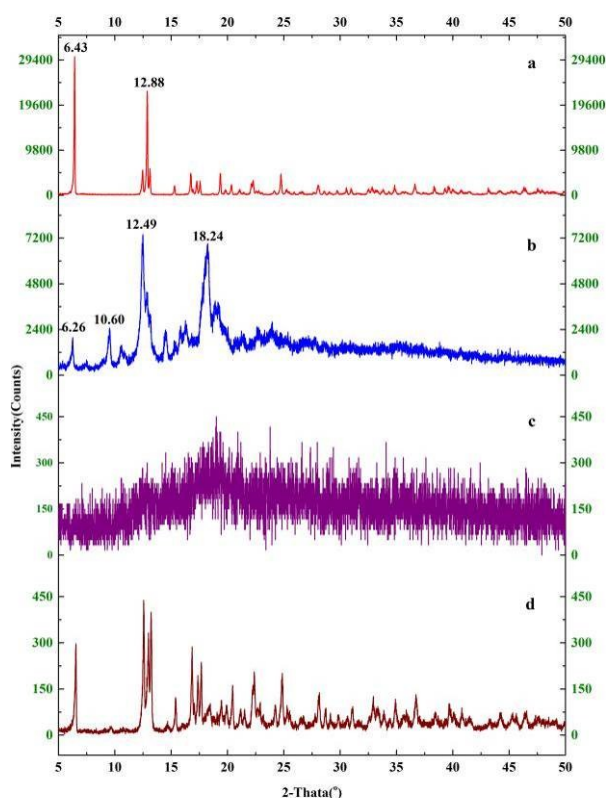

11 **Figure S1** XRD patterns: (a) satraplatin, (b)  $\beta$ -CD, (c) satraplatin/ $\beta$ -CD inclusion complex, (d) satraplatin/ $\beta$ -CD  
12 physical mixture

14

15

1

## 2 2. FTIR analysis

3

4 The FTIR spectra provided detailed information about the functional groups involved in the  
5 interaction when the complex was formed. The spectra of pure satraplatin,  $\beta$ -CD, their physical  
6 mixture, and the inclusion complex are shown in **Fig. S2**. The FTIR spectrum of  $\beta$ -CD showed  
7 prominent absorption bands at  $3390\text{ cm}^{-1}$  (for O-H stretching vibrations),  $2931\text{ cm}^{-1}$  (for C-H  
8 stretching vibrations),  $1641\text{ cm}^{-1}$  (for H-O-H bending),  $1153\text{ cm}^{-1}$  (for C-O stretching vibrations)  
9 and  $1035\text{ cm}^{-1}$  (for C-O-C stretching vibrations), as indicated by previous studies. The sharp and  
10 strong absorption bands, observed at  $3249$ ,  $3054$  and  $1249\text{ cm}^{-1}$  due to N-H and C-H stretching  
11 vibrations and bending vibrations in cyclohexane (**Fig. S2(a)**), respectively, in satraplatin were  
12 considerably reduced in the inclusion complex owing to complexation (**Fig. S2(c)**). For the  
13 inclusion complex (**Fig. S2(c)**), an additional key observation was an increase in the intensity and a  
14 slight redshift of the peak from  $3500\text{-}3000\text{ cm}^{-1}$  in the spectrum of the inclusion compound. In  
15 agreement with earlier reports, vibrational modes in the region of  $3500\text{-}3300\text{ cm}^{-1}$  have been  
16 correlated with of host-guest interactions as a result of water release upon inclusion. In addition, no  
17 additional peaks were detected in the spectrum of the inclusion complex, indicating the absence of  
18 any chemical reactions between satraplatin and  $\beta$ -CD. The spectrum of the physical mixture was  
19 equivalent to the simple combination of satraplatin and  $\beta$ -CD, and some characteristic absorption  
20 peaks of satraplatin at  $3243$ ,  $3064$ ,  $2846$ ,  $1357$ ,  $1301$  and  $705\text{ cm}^{-1}$  were easily observed (**Fig.**  
21 **S2(d)**), suggesting that the natural structure of satraplatin still existed without any interactions with  
22  $\beta$ -CD. These results indicate that a satraplatin/ $\beta$ -CD inclusion complex was obtained and that the  
23 large cyclohexane ring of satraplatin entered the cavity of  $\beta$ -CD during the formation of the  
24 inclusion complex.

25

26

1

2

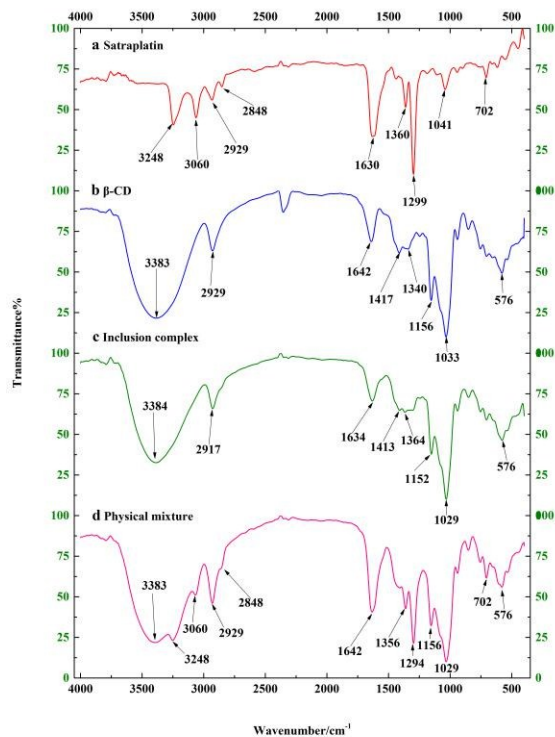

3

4 **Figure S2** FTIR spectra of (a) satraplatin, (b) β-CD, (c) the satraplatin/β-CD inclusion complex in a 1:1 molar  
5 ratio and (d) the satraplatin and β-CD physical mixture in a 1:1 molar ratio.

6

7

8

9

10

11

12

13

1

### 2 3. Other spectroscopy and spectra

3

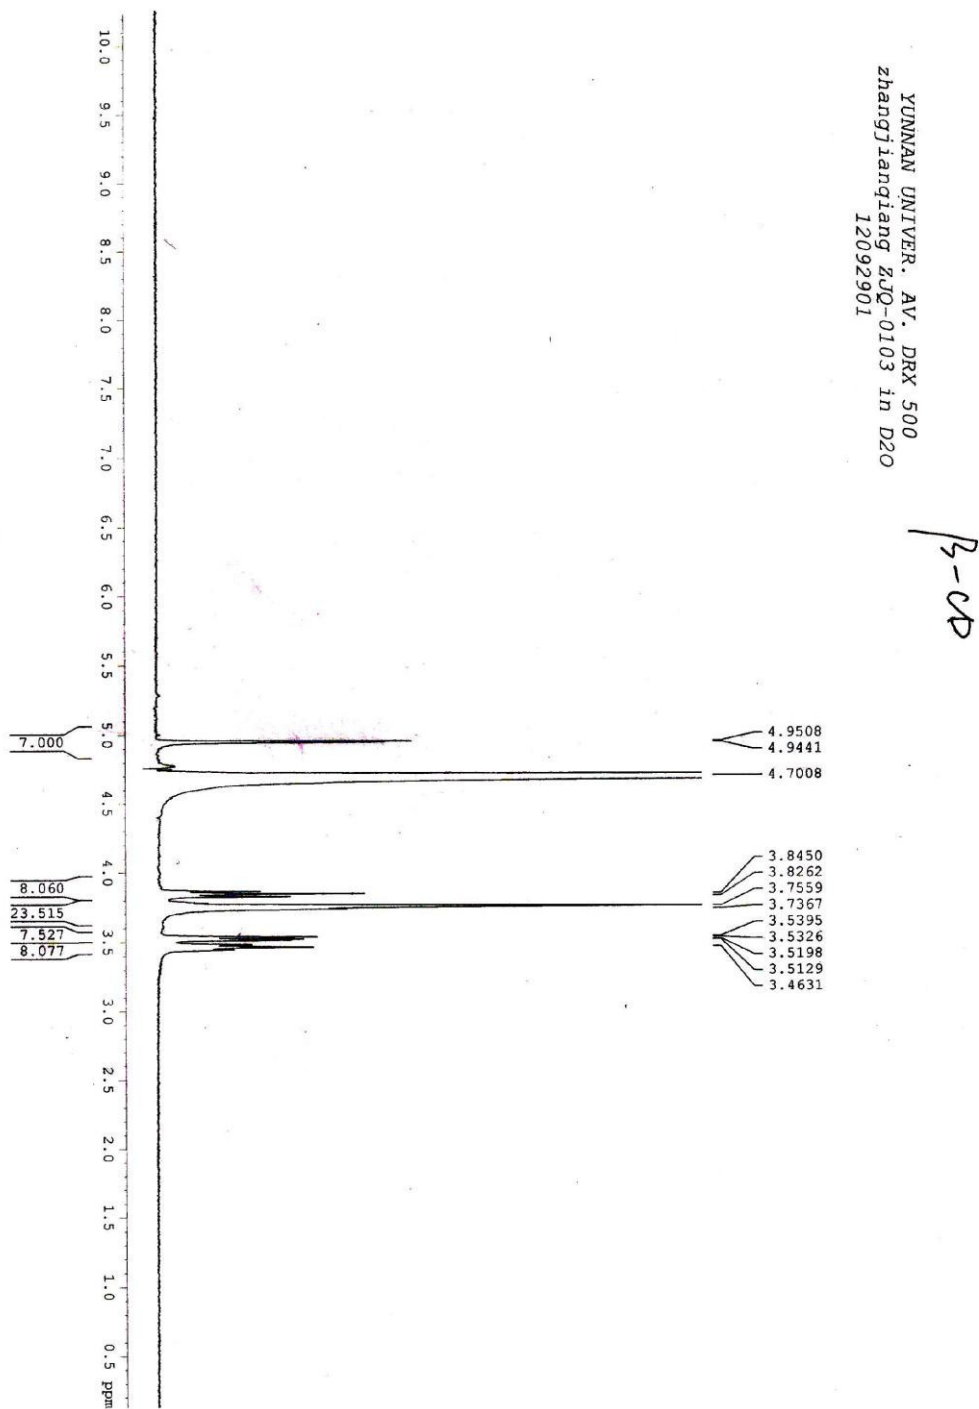

4

5 **Figure S3**  $^1\text{H}$  NMR spectra of  $\beta$ -CD in  $\text{D}_2\text{O}$ .

1  
2

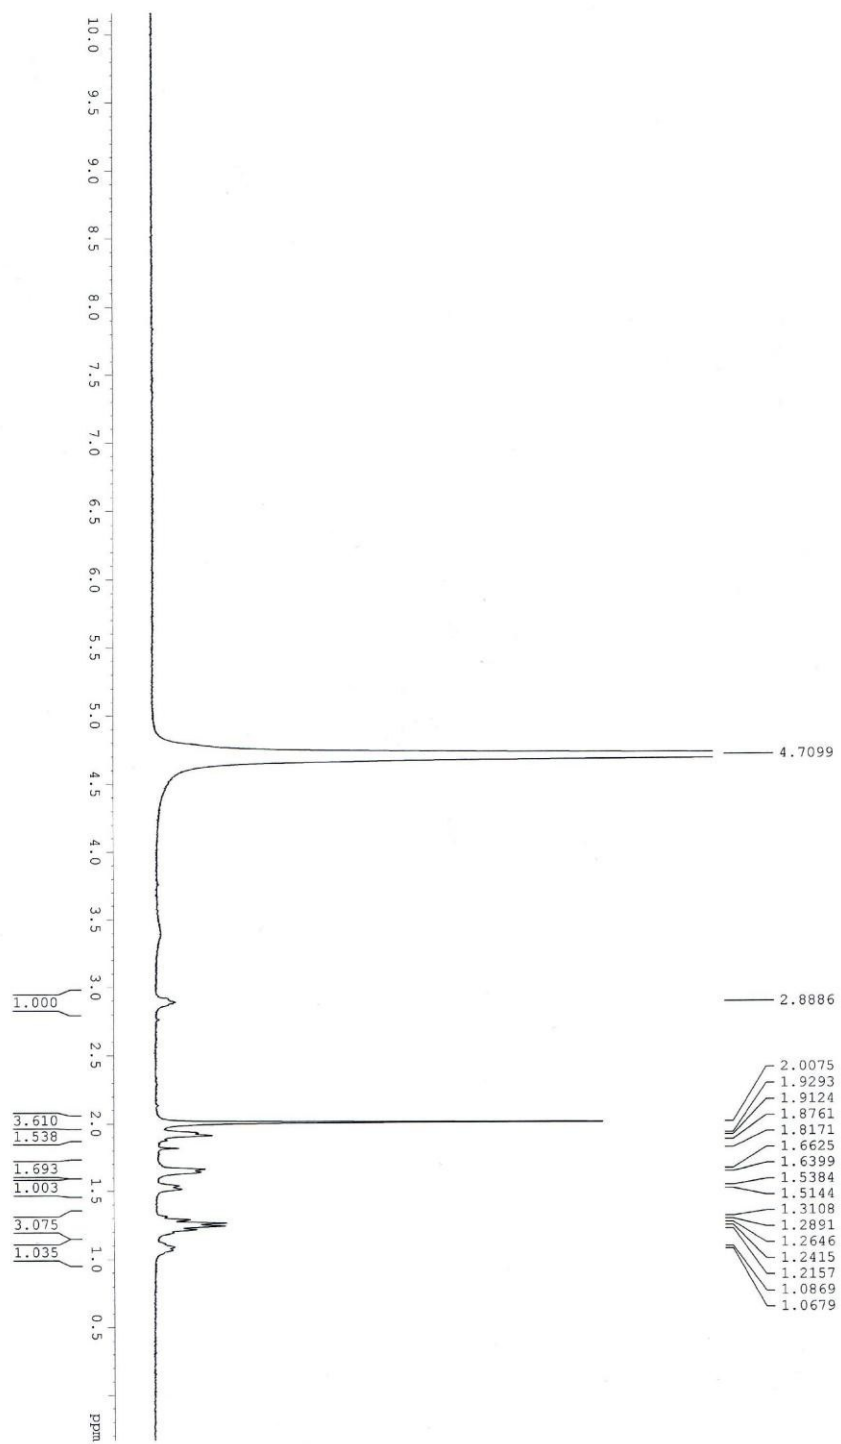

3

4 **Figure S4**  $^1\text{H}$  NMR spectra of Satraplatin in  $\text{D}_2\text{O}$ .

1

2

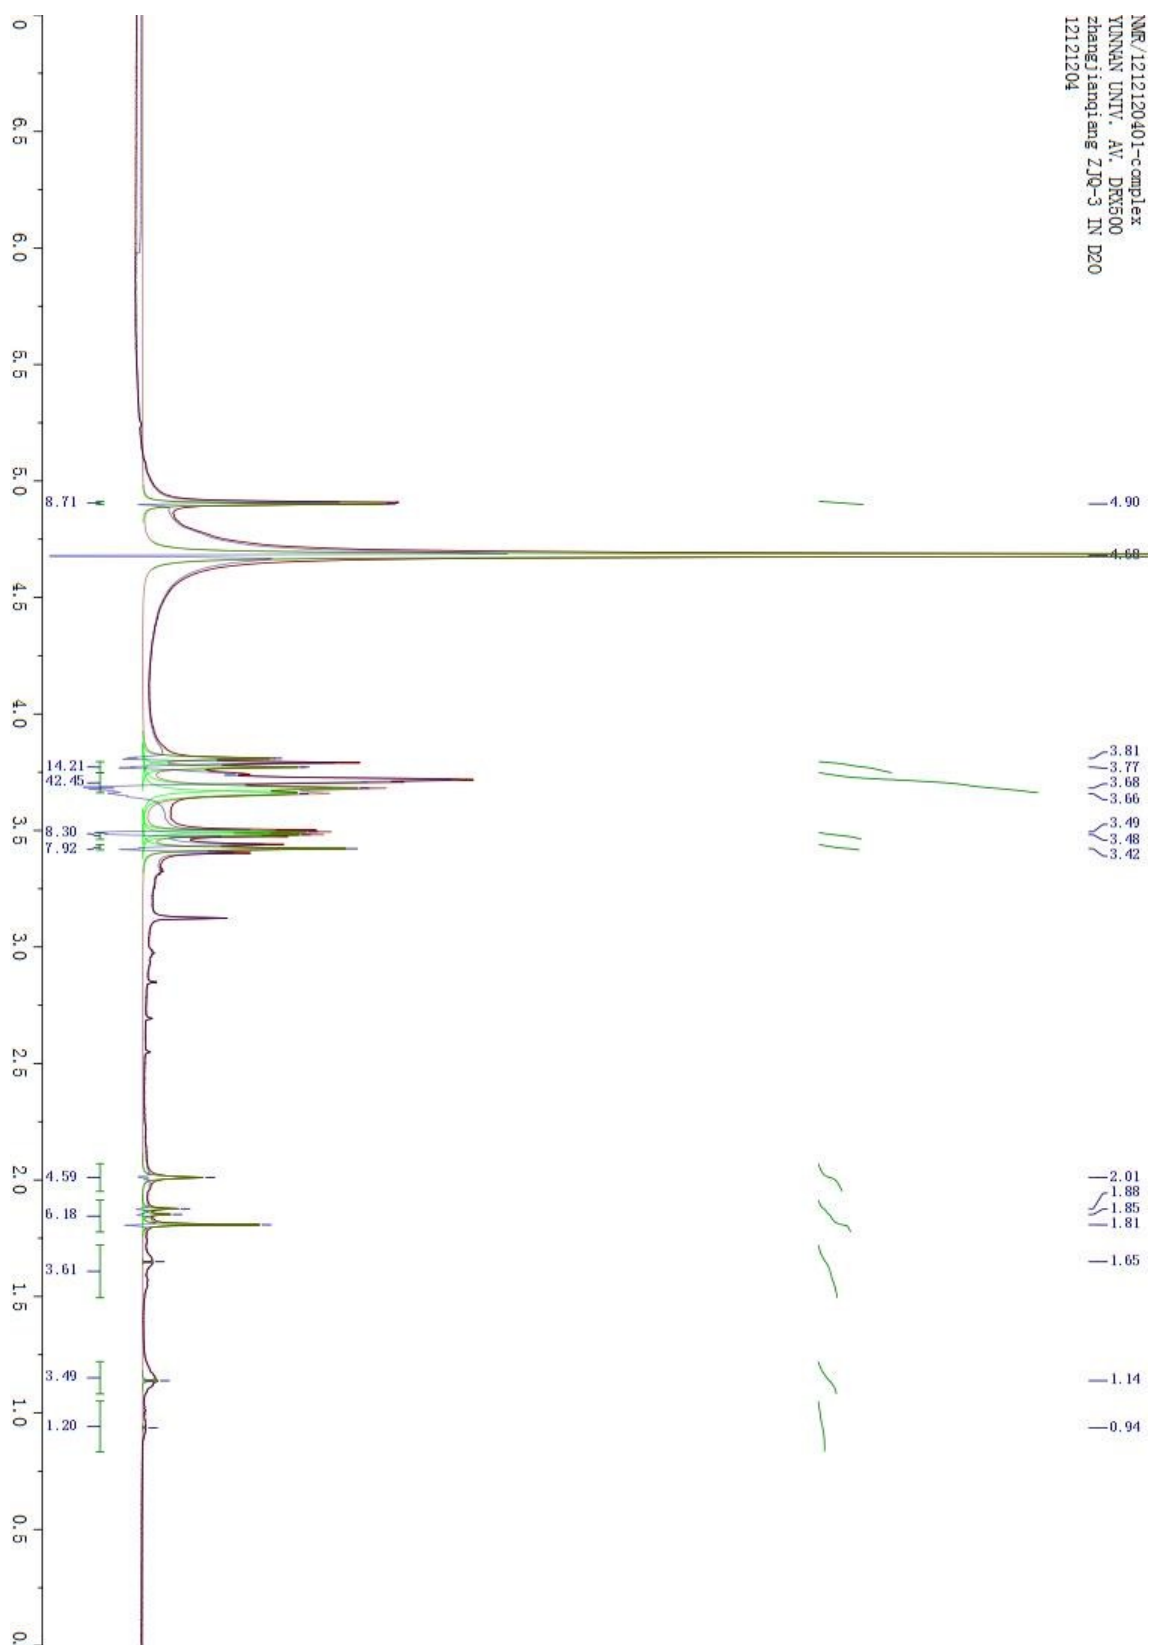

3

4 **Figure S5**  $^1\text{H}$  NMR spectra of Satraplatin/ $\beta$ -CD complex in  $\text{D}_2\text{O}$ .

1

2

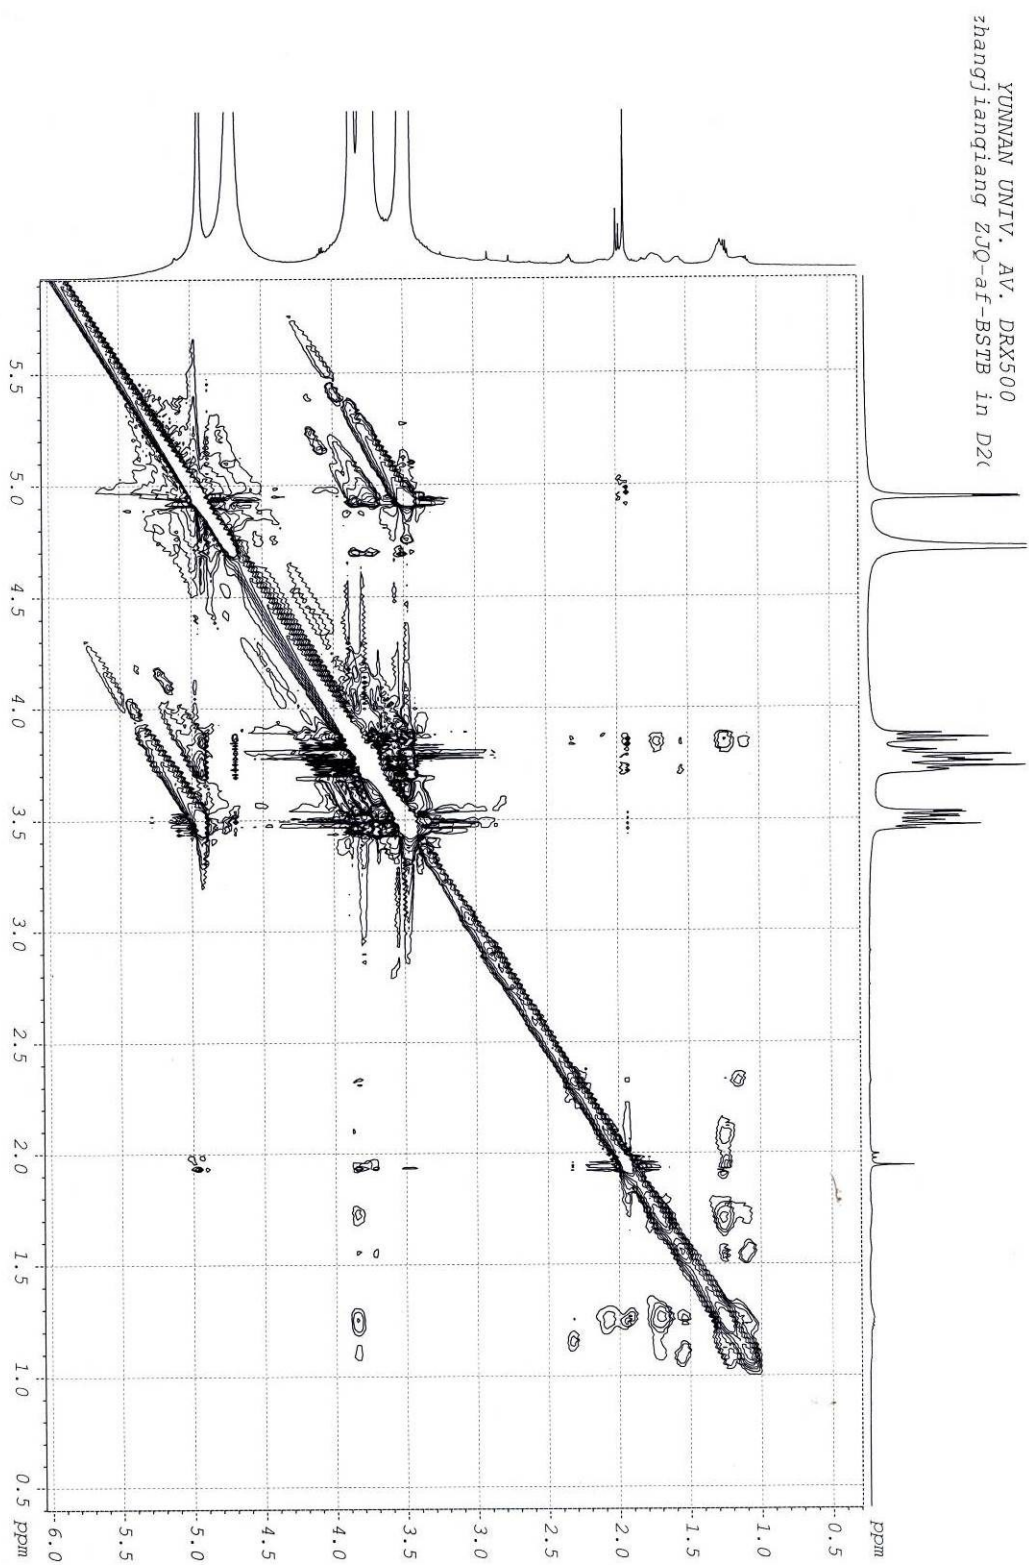

3

4 **Figure S6** ROESY spectrum of satraplatin/ $\alpha$ -CD complex in D<sub>2</sub>O.



1  
2

YUNNAN UNIV., AV. DRX500  
zhangjianqiang ZJQ-ga-BSTB in D2O

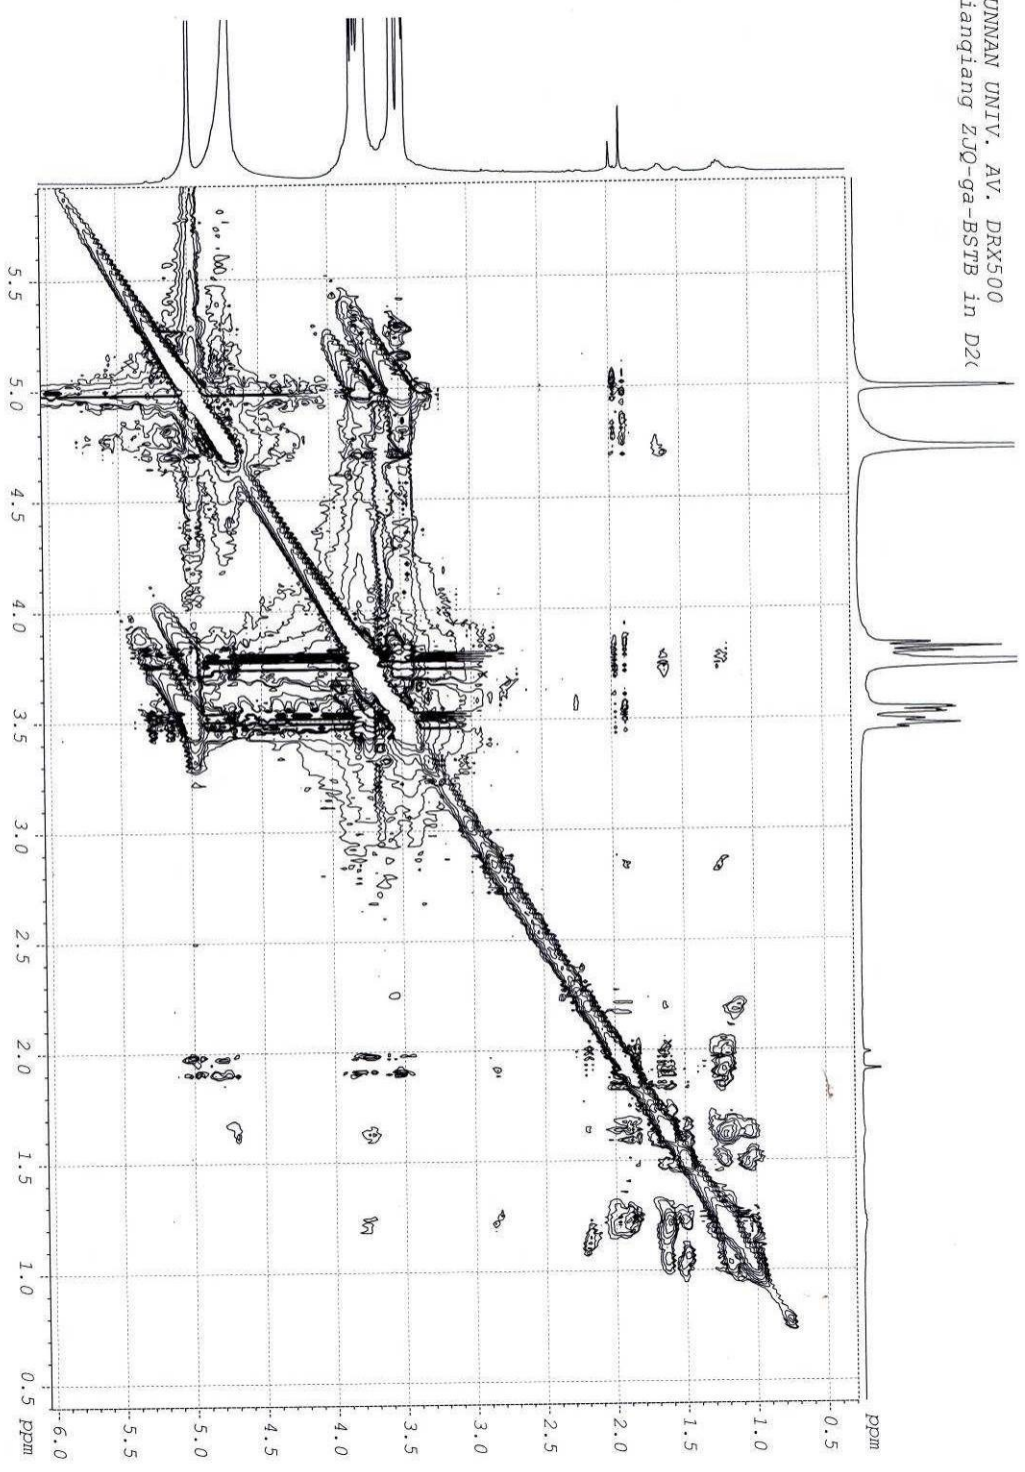

3

4 **Figure S7** ROESY spectrum of satraplatin/ $\gamma$ -CD complex in D<sub>2</sub>O.

1

2

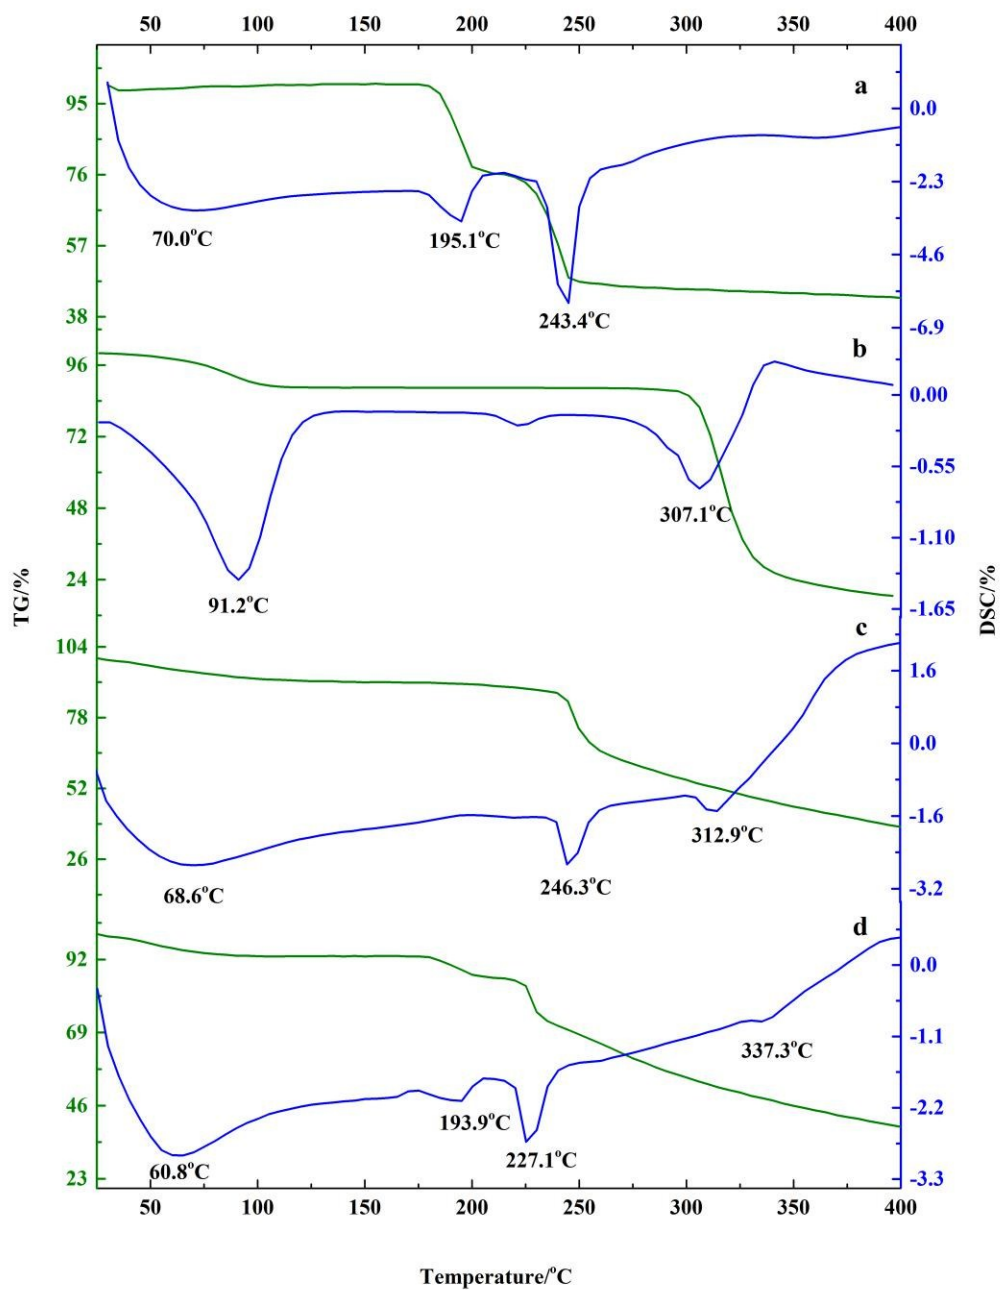

3

4

5 **Figure S8** DSC thermograms (blue Line) and TG (green line): (a) satraplatin, (b)  $\beta$ -CD, (c) satraplatin/ $\beta$ -CD

6 inclusion complex, (d) satraplatin/ $\beta$ -CD physical mixture.

7

1  
2  
3  
4  
5  
6  
7  
8  
9  
10  
11  
12  
13  
14  
15  
16  
17  
18  
19  
20  
21

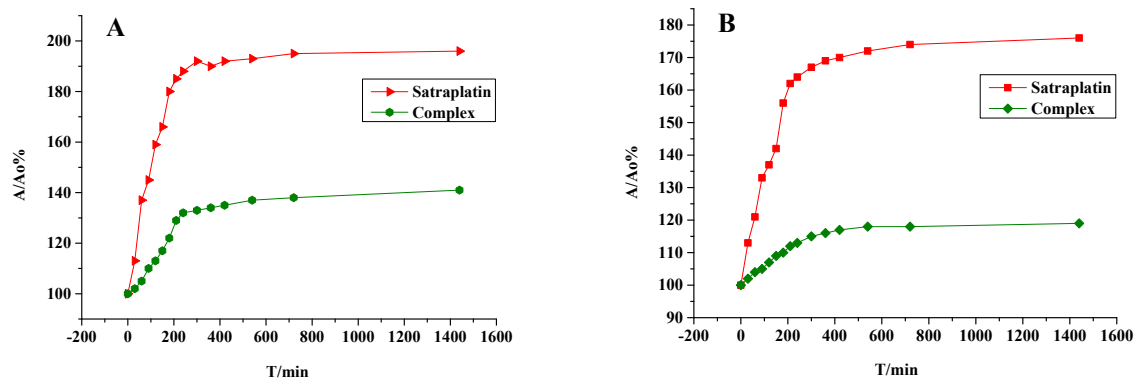

**Figure S9** Degradation profiles of satraplatin decomposition, (A) in pH 2.2 aqueous solution; and (B) in pH 7.3 aqueous solution.

1  
2  
3  
4  
5  
6  
7  
8  
9  
10  
11  
12  
13  
14  
15  
16  
17  
18  
19  
20

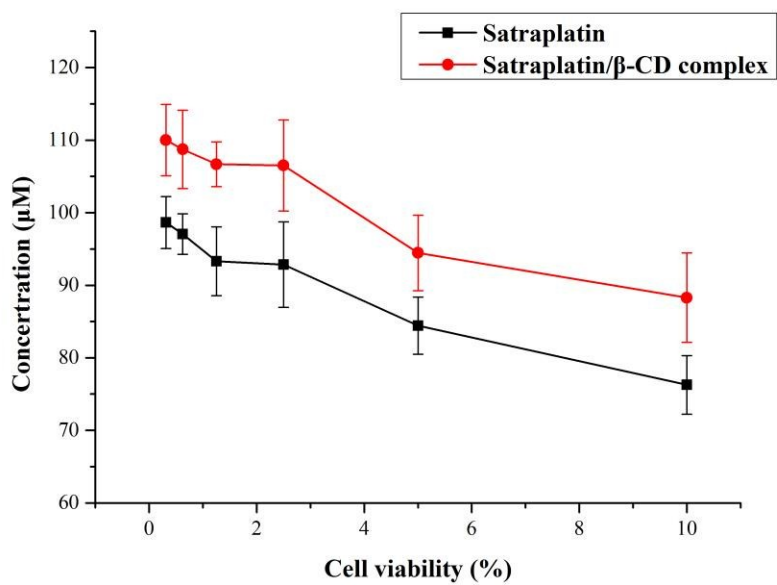

**Figure S10** Cytotoxicity assays (Caco-2) for satraplatin and satraplatin/β-CD complex at different concentration.

1  
2  
3

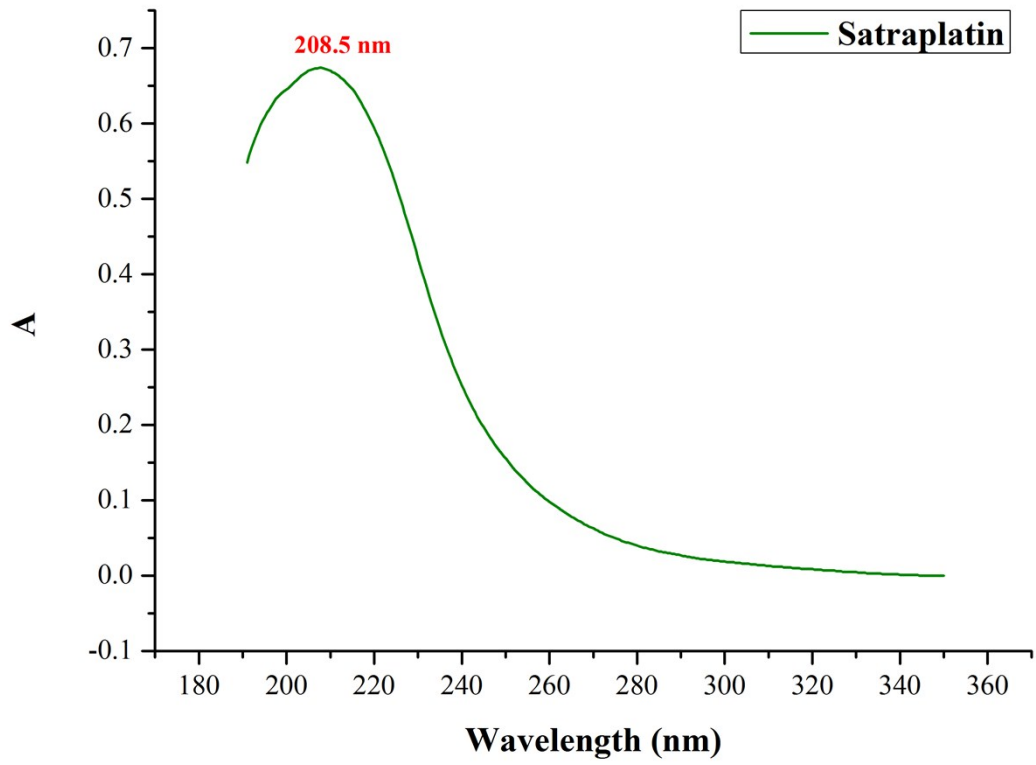

4  
5  
6  
7  
8  
9  
10  
11  
12  
13  
14  
15  
16  
17

**Figure S11** The UV-*vis* absorption spectra of satraplatin.

1  
2  
3  
4  
5  
6  
7  
8  
9  
10  
11  
12  
13  
14  
15  
16  
17  
18  
19  
20  
21

**Table S1** Inhibitory concentration (IC<sub>50</sub>) (μM) values calculated for β-CD, satraplatin, satraplatin/β-CD complex, satraplatin/α-CD complex, and satraplatin/γ-CD complex for the two different cancer cell lines A549 and MCF-7.

| Sample                   | IC <sub>50</sub> (μM) |       |
|--------------------------|-----------------------|-------|
|                          | A549                  | MCF-7 |
| β-CD                     | >500                  | >500  |
| Satraplatin              | 10.12                 | 0.25  |
| Satraplatin/β-CD complex | 6.09                  | 0.14  |
| Satraplatin/α-CD complex | 45.12                 | 56.38 |
| Satraplatin/γ-CD complex | 50.48                 | 65.32 |

1  
2  
3  
4 **Table S2** Chemical Shifts of  $^1\text{H}$  NMR of satraplatin Protons in the presence and absence of satraplatin.  
5

| protons                      |   | chemical shift (ppm)          |                                               |                |
|------------------------------|---|-------------------------------|-----------------------------------------------|----------------|
|                              |   | $\delta_{\text{satraplatin}}$ | $\delta_{\text{satraplatin}/\beta\text{-CD}}$ | $\Delta\delta$ |
| H-1, 2(CH <sub>3</sub> )     | m | 2.008                         | 2.060                                         | 0.052          |
| H-3                          | s | 2.889                         | 2.978                                         | 0.089          |
| H-4, 8( $\alpha$ -H)         | m | 1.698                         | 1.872                                         | 0.174          |
| H-5, 7( $\alpha$ -H)         | m | 1.589                         | 1.698                                         | 0.109          |
| H-6( $\alpha$ -H)            | m | 1.526                         | 1.589                                         | 0.063          |
| H-4, 5, 6, 7, 8( $\beta$ -H) | m | 1.264                         | 1.202                                         | -0.62          |

6  
7  
8  
9
